# Supplementary material
Source: PubMed Central journal article supplement (PMC8648956)
Supplement: 41422_2021_566_MOESM2_ESM.pdf [file 41422_2021_566_MOESM2_ESM.pdf]

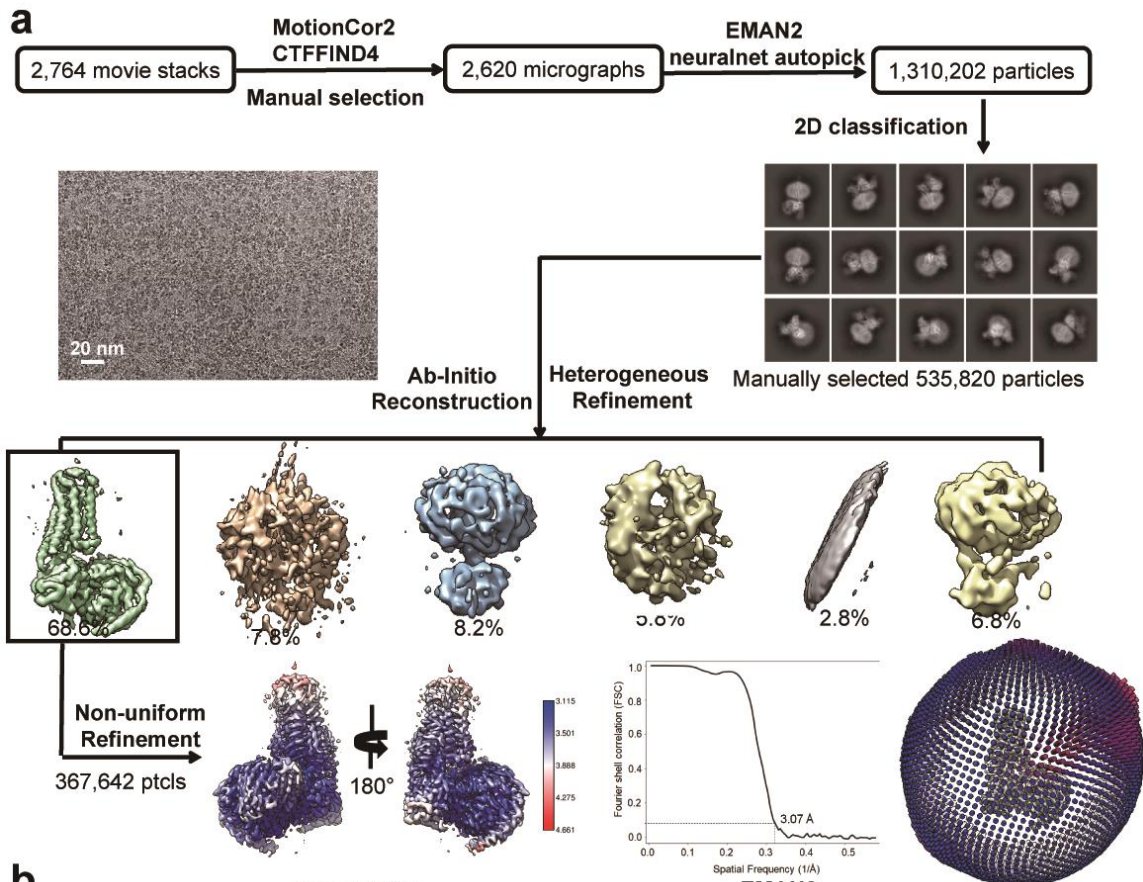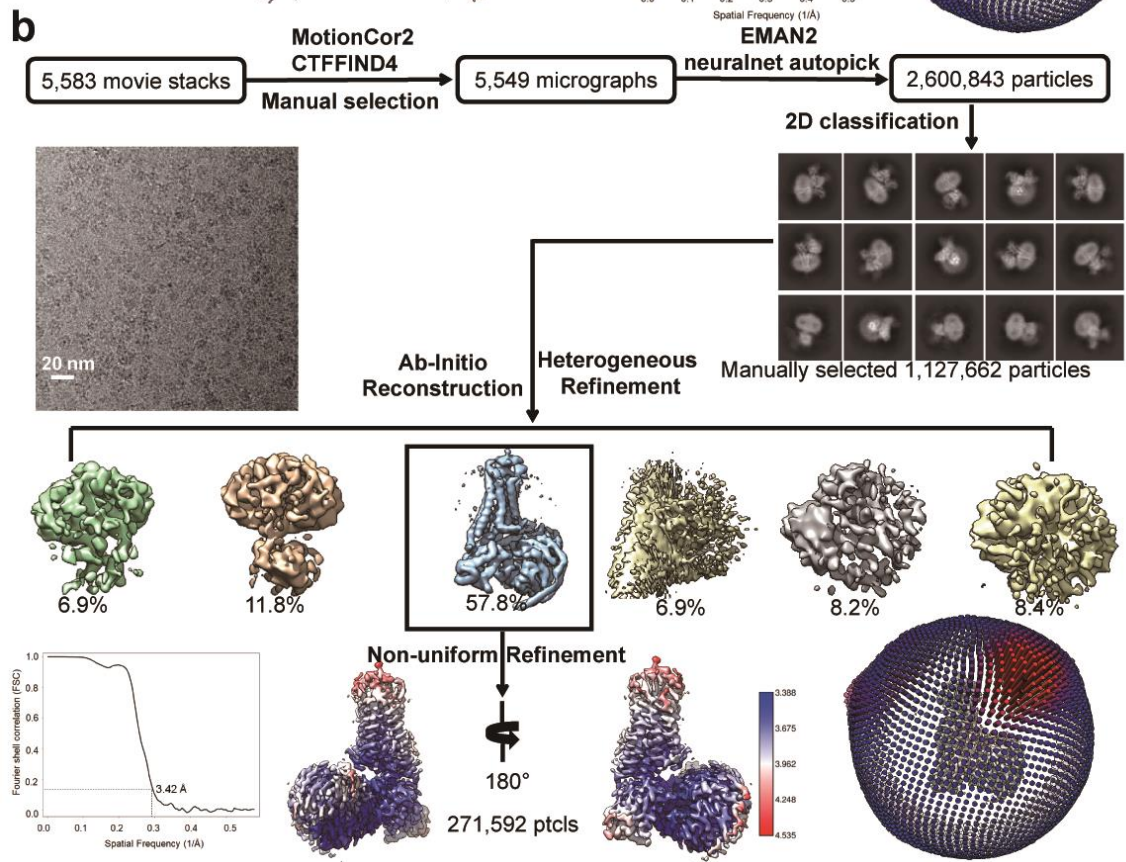

**Figure S2. The cenerimod/ozanimod bound S1PR1-Gi-scFv16 complex cryo-EM data collection, structure determination, and cryo-EM map quality.**

(a) Flow chart of Cryo-EM single particle reconstruction of cenerimod bound S1PR1-Gi complex. Single particle pipeline yields the final cryo-EM reconstruction with the FSC curve, corresponding angular distribution and local resolution map. FSC curve shows a 3.07 Å resolution according to the 0.143 cut-off.

(b) Flow chart of Cryo-EM single particle reconstruction of ozanimod bound S1PR1-Gi complex. Single particle pipeline yields the final cryo-EM reconstruction with the FSC curve, corresponding angular distribution and local resolution map. FSC curve shows a 3.42 Å resolution according to the 0.143 cut-off.
