# Supplementary material
Source: PubMed Central journal article supplement (PMC8648956)
Supplement: 41422_2021_566_MOESM5_ESM.pdf [file 41422_2021_566_MOESM5_ESM.pdf]

**a** ■ siponimod ■ ozanimod  
 ■ cenerimod ■ S1PR1

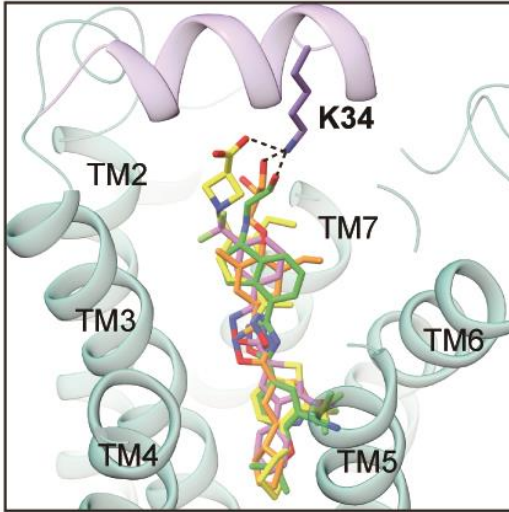

**c** ■ siponimod ■ ozanimod  
 ■ cenerimod ■ SEW2871

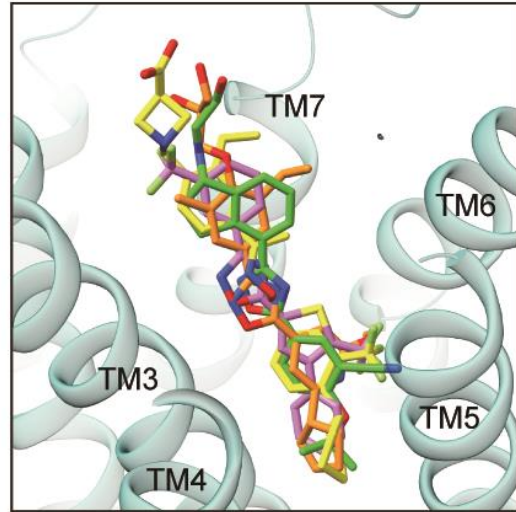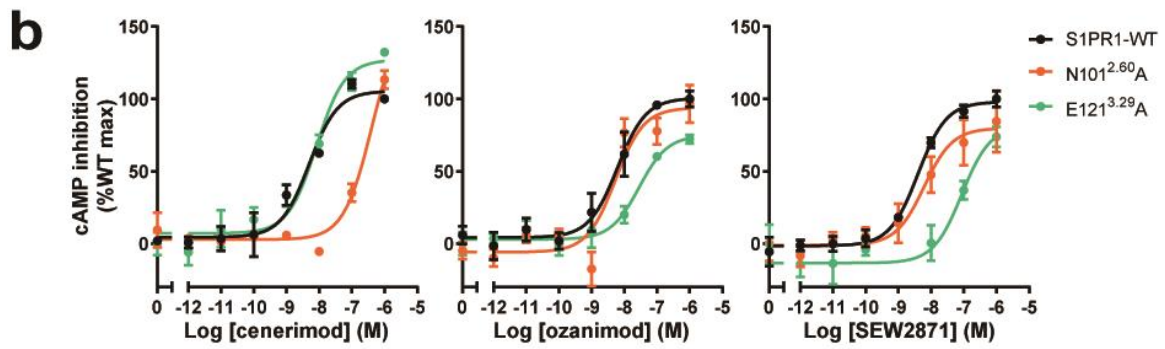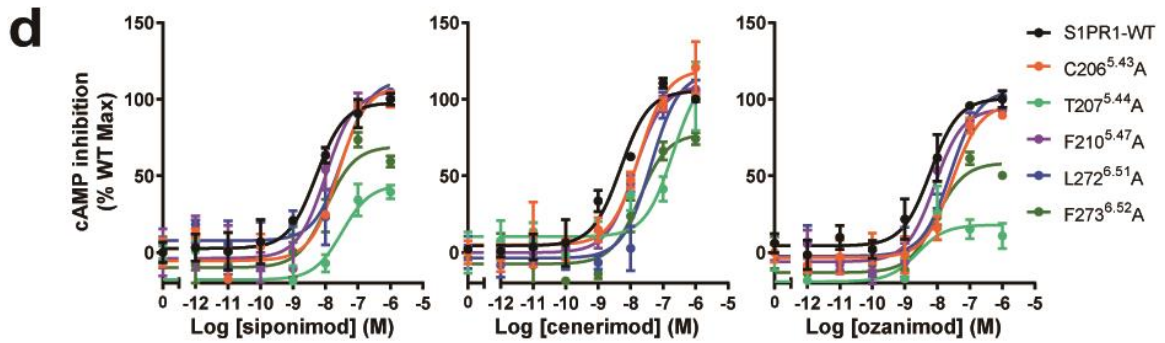

**Figure S5. Comparison of the ligand recognition among chemically distinct agonists bound S1PR1-Gi complexes**

(a) The hydrogen bond interaction of the polar headgroups from siponimod (yellow), cenerimod (dark orange) and ozanimod (lime green) with the same residue K34<sup>N-ter</sup> of S1PR1 are observed in S1PR1-Gi complexes.

(b) Effects of the N101<sup>2.60</sup>A, and E121<sup>3.29</sup>A mutations of S1PR1 on cenerimod, ozanimod, and SEW2871 induced cAMP inhibition. Data are presented as the mean  $\pm$  SEM of three independent experiments performed in triplicate.

(c) Structural superposition of siponimod (yellow)-, cenerimod (dark orange)-, ozanimod (lime green)-, and SEW2871 (orchid)-bound S1PR1 reveals that the hydrophobic pattern of ligand inserted the nearly identical narrow hydrophobic pocket of receptor.

(d) Effects of the C206<sup>5.43</sup>A, T207<sup>5.44</sup>A, F210<sup>5.47</sup>A, F273<sup>6.52</sup>A mutations of S1PR1 on siponimod, cenerimod and ozanimod induced cAMP inhibition. Data are presented as the mean  $\pm$  SEM of three independent experiments performed in triplicate.
