# Supplementary material
Source: PubMed Central journal article supplement (PMC8648956)
Supplement: 41422_2021_566_MOESM6_ESM.pdf [file 41422_2021_566_MOESM6_ESM.pdf]

**a** S1P-S1PR3 (Active)  
ML056-S1PR1 (Inactive)

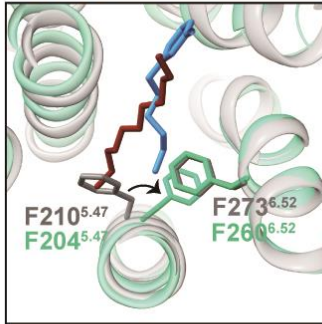

**b** S1PR1-Gi signaling assay

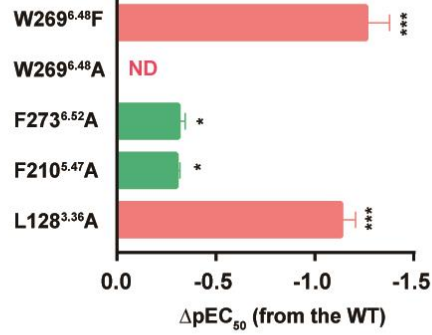

**c** FUB-CB1 (Active)

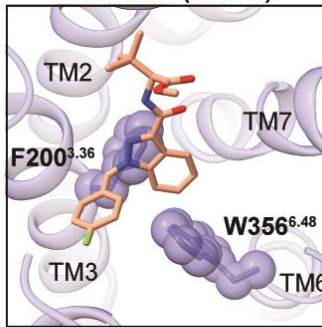

Tarananant-CB1 (Inactive)

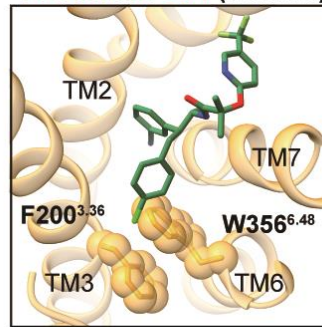

**e** S1PR1 / S1PR5 PIF motif

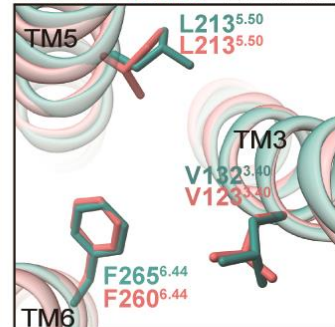

**d**

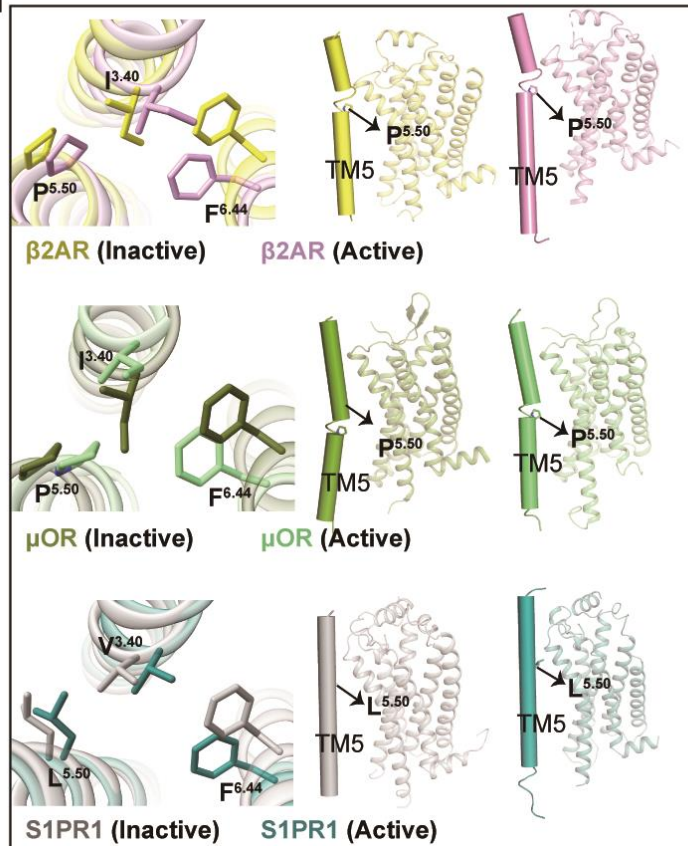

**f**

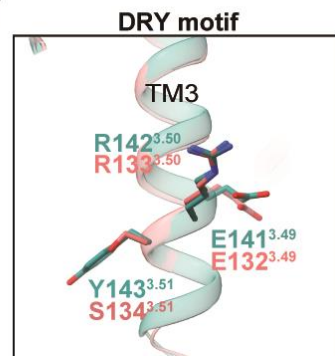

**g**

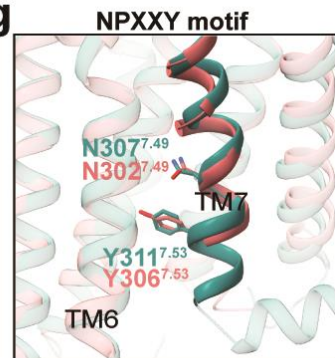

### Figure S6. Structural features in S1PR1 upon activation

(a) Structural superposition of S1P-bound activated S1PR3 and ML056-bound inactivated S1PR1. The side-chain of residue F<sup>5.47</sup> in SPR3 is observed to exhibit notable displacement whereas the F<sup>6.52</sup> in both structures adopt the same conformation. Medium spring greer, S1PR3; S1P, maroon; gray, S1PR1; dodger blue, ML056.

(b) Effects of the mutants of S1PR1 on siponimod-induced cAMP inhibition. Bars represents difference in calculated potency (pEC<sub>50</sub>) of agonist for mutations relative to WT of S1PR1. Data are colored according to extent of effect. ND, not detected, \*p < 0.1, \*\*\*p < 0.001 (one-way analysis of variance [ANOVA] followed by the Dunnett's test, compared with the response of WT). Data represent mean ± SEM from three independent experiments performed in triplicate.

(c) Structural comparison MDMB-Fubinaca (FUB) bound CB1 (agonist, light salmon, PDB: 6N4B) with Taranabant bound CB1 (antagonist, sea green, PDB: 5U09) reveals the toggle switches F<sup>3.36</sup>-W<sup>6.48</sup> activation mechanism in receptor.

(d) Structural rearrangement of P<sup>5.50</sup>-I<sup>3.40</sup>-F<sup>6.44</sup> motif in S1PR1 (inactive PDB: 3V2Y, gray; active, teal), β<sub>2</sub>AR (inactive PDB: 2RH1, yellow; active PDB: 3SN6, plum) and μOR (inactive PDB: 4DKL, dark olive green; active PDB: 6DDE, light green) upon activation. S1PR1 is absent of proline at the position 5.50, which is substituted by leucine.

(e-g) Superposition of microswitches between S1PR1 and S1PR5. P<sup>5.50</sup>-I<sup>3.40</sup>-F<sup>6.44</sup> motif (e); E<sup>3.49</sup>-R<sup>3.50</sup>-Y motif (f); N-P<sup>7.50</sup>xxY<sup>7.53</sup> motif (g).
