# Supplementary material
Source: PubMed Central journal article supplement (PMC8648956)
Supplement: 41422_2021_566_MOESM7_ESM.pdf [file 41422_2021_566_MOESM7_ESM.pdf]

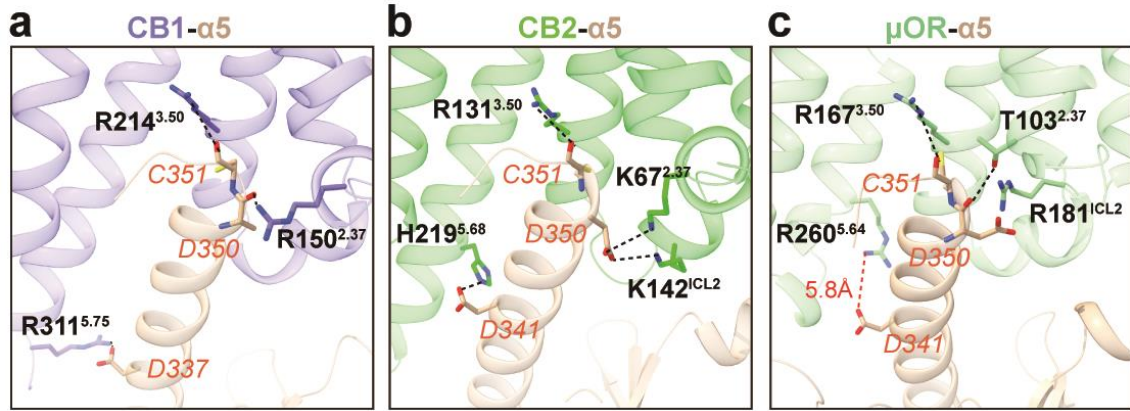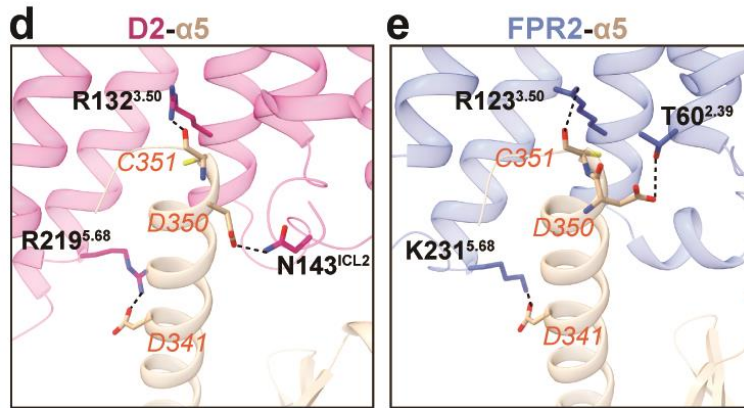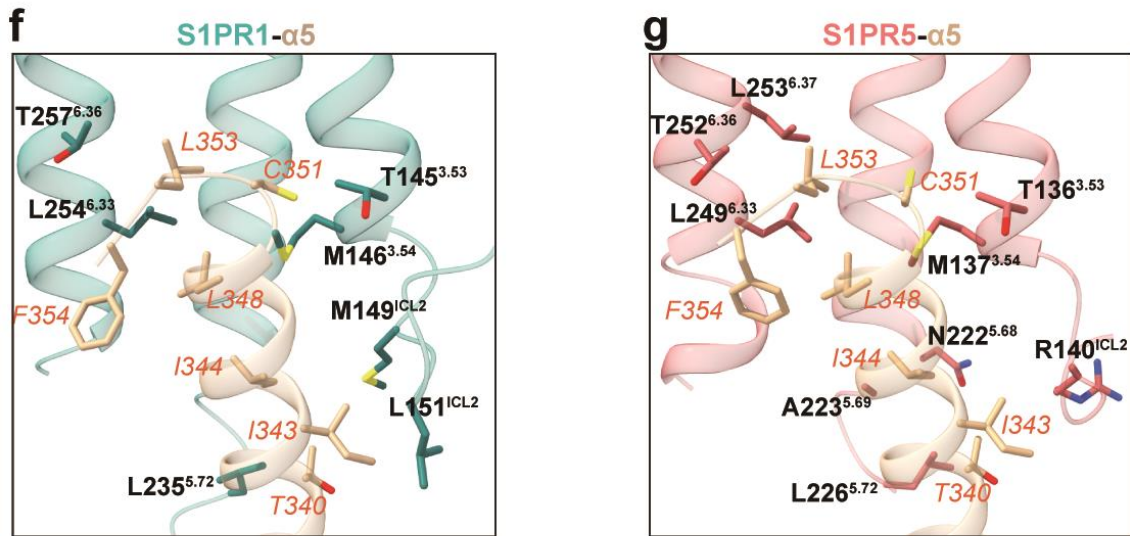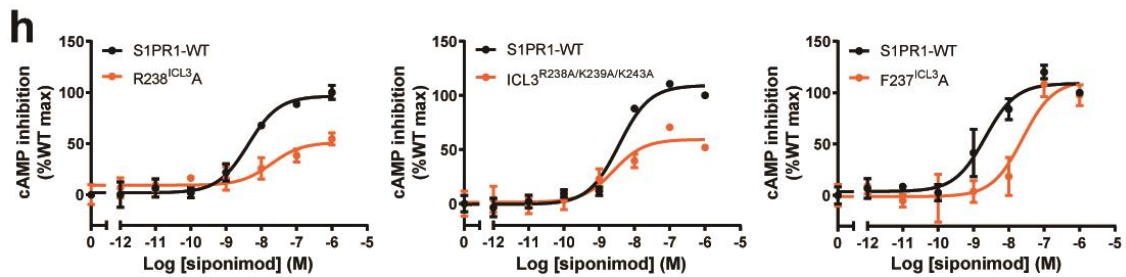

**Figure S7. Comparison of receptor-Gi interface between S1PRs-Gi complex and previously reported receptors-Gi complexes.**

(a-e) Polar interactions in complex structures of CB1 (slate blue)-G $\alpha$ i, CB2 (lime)-G $\alpha$ i,  $\mu$ OR (light green)-G $\alpha$ i, D2 (deep pink)-G $\alpha$ i and FPR2(royal blue)-G $\alpha$ i. Residues from  $\alpha$ 5 are shown in orange font. The residues belonging to S1PR1 are shown in black font. Polar interactions are highlighted as black dashed lines.

(f-g) Hydrophobic pattern between S1PR1 (f) or S1PR5 (g) and the hydrophobic side of  $\alpha$ 5 helix from G $\alpha$ i.

(h) Effects of the R238<sup>ICL3</sup>A and ICL3<sup>R238A/K239A/K243A</sup> and F237<sup>ICL3</sup>A mutants of S1PR1 on siponimod induced cAMP inhibition. Data are presented as the mean  $\pm$  SEM of three independent experiments performed in triplicate.
