# Supplementary material
Source: PubMed Central journal article supplement (PMC8648956)
Supplement: 41422_2021_566_MOESM8_ESM.pdf [file 41422_2021_566_MOESM8_ESM.pdf]

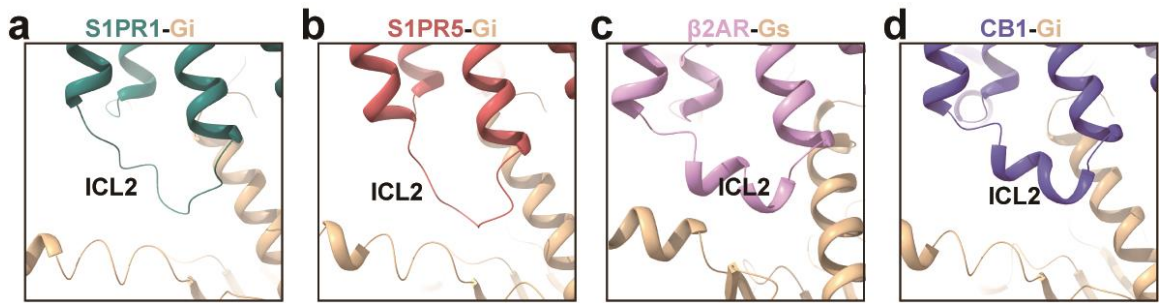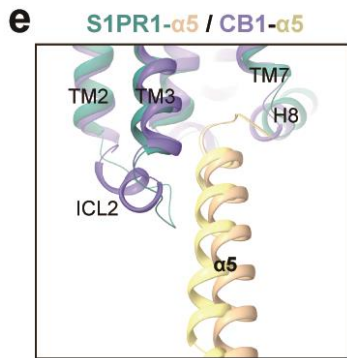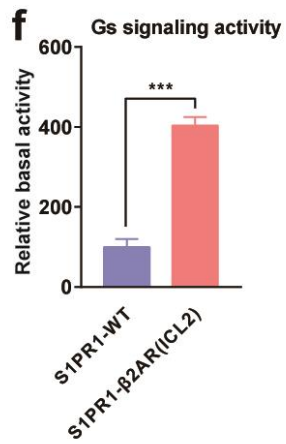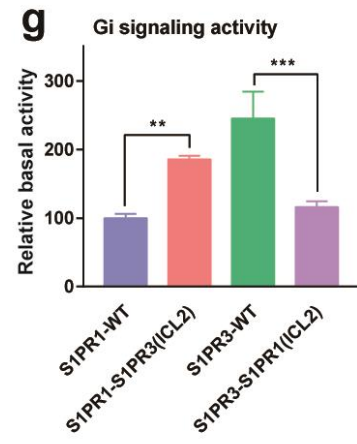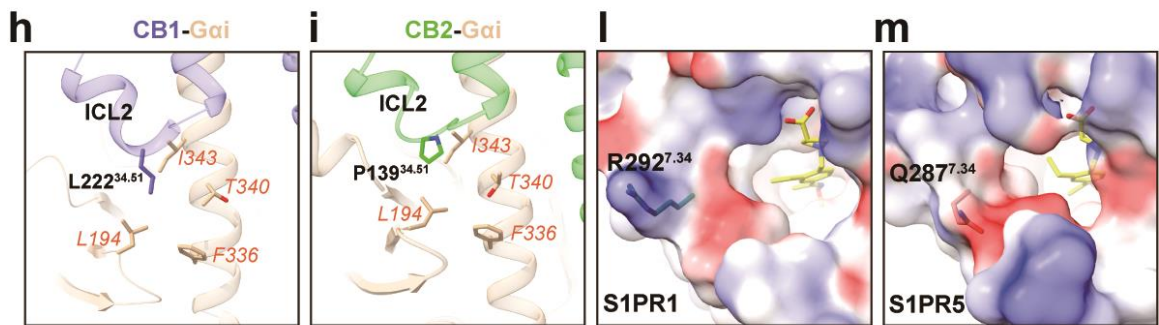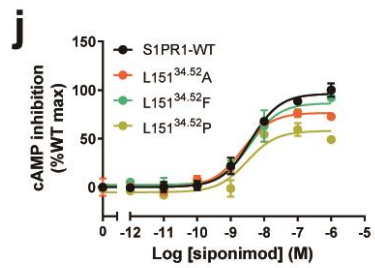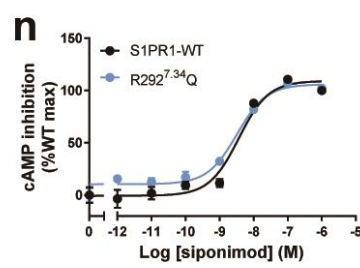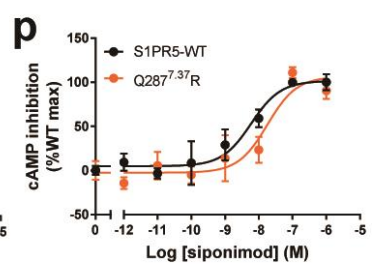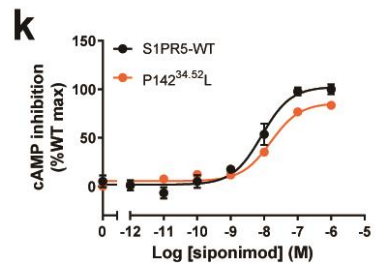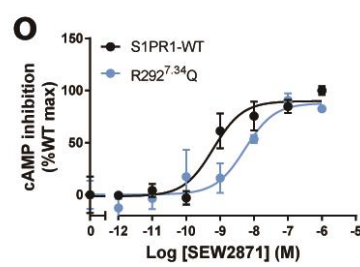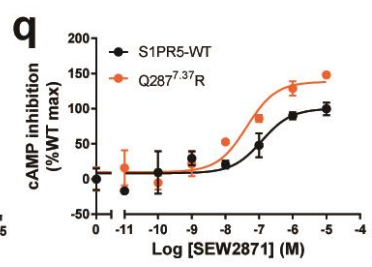

**Figure S8. The interaction of the ICL2 with Gi protein, and functional assays for ligand selectivity in both S1PR1 and S1PR5.**

(a-d) Structural comparison of ICL2 regions of S1PR1(teal), S1PR5 (Indian red),  $\beta_2$ AR (plum) and CB1(slate blue) with G protein complexes reveals the unique conformation in S1PR.

(e) Structural superposition of S1PR1-G $\alpha_i$  (teal, S1PR1; tan, G $\alpha_i$ ) and CB1-G $\alpha_i$  (slate blue, CB1; khaki, G $\alpha_i$ ) when aligning on the receptor.

(f-g) Basal activity of G protein signaling of S1PRs. The basal activity of Gs signaling of wide-type S1PR1 and S1PR1- $\beta_2$ AR(ICL2) chimeras (f). The basal activity of Gi signaling of S1PR1, S1PR1-S1PR3(ICL2), S1PR3 and S1PR3-S1PR1(ICL2) (g). Bar represents difference in calculated relative basal activity of G protein signaling of chimeras to each WT. ns, no significance, \*\*p < 0.01, \*\*\*p < 0.001 (one-way analysis of variance [ANOVA] followed by the Dunnett's test, compared with the response of WT). Data represent mean  $\pm$  SEM from three independent experiments performed in triplicate.

(h-i) The detailed interaction of L222<sup>ICL2/34.51</sup> in CB1(slate blue) with the residues L194<sup>G.S3.01</sup>, I343<sup>G.H5.15</sup>, T340<sup>G.H5.12</sup>, F336<sup>G.H5.08</sup> in G $\alpha_i$ , as well as P139<sup>ICL2/34.51</sup> in CB2(lime) with the residues L194<sup>G.S3.01</sup>, I343<sup>G.H5.15</sup>, T340<sup>G.H5.12</sup>, F336<sup>G.H5.08</sup> in G $\alpha_i$ . Residues from  $\alpha_5$  are shown in orange font. The residues belonging to S1PR1 are shown in black font.

(j-k) Effects of the L151<sup>ICL2/34.52</sup>A, L151<sup>ICL2/34.52</sup>P, L151<sup>ICL2/34.52</sup>F mutation of S1PR1 (j) and P142<sup>ICL2/34.52</sup> mutation of S1PR5 (k) on siponimod induced cAMP inhibition. Data are presented as the mean  $\pm$  SEM of three independent experiments performed in triplicate.

(l-m) Surface representation of charge property of S1PR1 (l) and S1PR5 (m) colored according to their electrostatic charge.

(n-o) Effects of the R292<sup>7.34</sup>Q mutation of S1PR1 on Siponimod (n) and SEW2871 (o) induced cAMP inhibition. Data are presented as the mean  $\pm$  SEM of three independent experiments performed in triplicate.

(p-q) Effects of the Q287<sup>7.34</sup>R mutation of S1PR5 on siponimod (p) and SEW2871 (q) induced cAMP inhibition. Data are presented as the mean  $\pm$  SEM of three independent experiments performed in triplicate.
