# Supplementary material
Source: PubMed Central journal article supplement (PMC8648956)
Supplement: 41422_2021_566_MOESM9_ESM.pdf [file 41422_2021_566_MOESM9_ESM.pdf]

Supplementary Information Table S1. Cryo-EM data collection, refinement and validation statistics.

| <b>Data collection and processing</b> | <b>S1PR1-Gi-Siponimod</b> | <b>S1PR1-Gi-Cenerimod</b> | <b>S1PR1-Gi-Ozanimod</b> | <b>S1PR1-Gi-SEW2871</b> | <b>S1PR5-Gi-Siponimod</b> |
|---------------------------------------|---------------------------|---------------------------|--------------------------|-------------------------|---------------------------|
| Magnification                         | 105,000                   | 105,000                   | 165,000                  | 165,000                 | 165,000                   |
| Voltage (kV)                          | 300                       | 300                       | 300                      | 300                     | 300                       |
| Electron exposure (e <sup>-</sup> /Å) | 63                        | 63                        | 50                       | 53                      | 56                        |
| Defocus range (μm)                    | -2.5 ~ -0.3               | -2.9 ~ -0.5               | -2.3 ~ -0.8              | -2.6 ~ -0.4             | -3.4 ~ -0.6               |
| Pixel size (Å)                        | 0.855                     | 0.855                     | 0.85                     | 0.85                    | 0.85                      |
| Symmetry imposed                      | C1                        | C1                        | C1                       | C1                      | C1                        |
| Initial particle images (no.)         | 4,099,015                 | 2,149,555                 | 2,919,708                | 5,964,002               | 2,946,284                 |
| Final particle images (no.)           | 591,794                   | 367,642                   | 271,592                  | 438,020                 | 366,479                   |
| Map resolution (Å)                    | 2.98                      | 3.07                      | 3.42                     | 3.27                    | 3.4                       |
| FSC threshold                         | 0.143                     | 0.143                     | 0.143                    | 0.143                   | 0.143                     |
| Map resolution range (Å)              | 3.0~4.6                   | 3.1~4.2                   | 3.4~4.5                  | 3.2~4.7                 | 3.3~6.8                   |
| <b>Refinement</b>                     |                           |                           |                          |                         |                           |
| Initial model used (PDB code)         |                           |                           |                          |                         |                           |
| Model resolution (Å)                  | 3.7                       | 3.7                       | 3.9                      | 3.8                     | 3.4                       |
| FSC threshold                         | 0.5                       | 0.5                       | 0.5                      | 0.5                     | 0.5                       |
| Map sharpening <i>B</i> factor (Å)    | -129.8                    | -133.2                    | -132.9                   | -128.2                  | -145.1                    |
| <b>Model composition</b>              |                           |                           |                          |                         |                           |
| Non-hydrogen atoms                    | 9,024                     | 9,078                     | 8,987                    | 9,004                   | 8,728                     |
| Protein residues                      | 1,144                     | 1,144                     | 1,142                    | 1,144                   | 1,128                     |
| Ligands                               | 1                         | 1                         | 1                        | 1                       | 1                         |
| Lipid                                 | 0                         | 4                         | 0                        | 0                       | 0                         |
| <b><i>B</i> factor (Å)</b>            |                           |                           |                          |                         |                           |
| Protein                               | 87.14                     | 95.65                     | 82.68                    | 89.93                   | 81.63                     |
| Ligand                                | 98.45                     | 115.10                    | 97.60                    | 140.33                  | 141.02                    |
| <b>R.m.s. deviations</b>              |                           |                           |                          |                         |                           |
| Bond lengths (Å)                      | 0.003                     | 0.002                     | 0.003                    | 0.002                   | 0.002                     |
| Bond angles (°)                       | 0.578                     | 0.535                     | 0.601                    | 0.550                   | 0.613                     |
| <b>Validation</b>                     |                           |                           |                          |                         |                           |
| MolProbity score                      | 1.66                      | 1.57                      | 1.53                     | 1.61                    | 1.72                      |
| Clash score                           | 8.78                      | 6.83                      | 6.64                     | 6.68                    | 12.24                     |
| <b>Ramachandran plot</b>              |                           |                           |                          |                         |                           |
| Favored (%)                           | 96.89                     | 96.80                     | 97.06                    | 96.36                   | 97.38                     |
| Allowed (%)                           | 3.11                      | 3.20                      | 2.94                     | 3.64                    | 2.62                      |
| Outliers (%)                          | 0                         | 0                         | 0                        | 0                       | 0                         |
