# Supplementary material
Source: PubMed Central journal article supplement (PMC8648956)
Supplement: 41422_2021_566_MOESM10_ESM.pdf [file 41422_2021_566_MOESM10_ESM.pdf]

Supplementary information Table S2. Summary of cAMP inhibition assay of S1PR1

| Receptor                          | cAMP inhibition assay |       |                       |      |                       |      |                       |      | Expression level (%WT) |
|-----------------------------------|-----------------------|-------|-----------------------|------|-----------------------|------|-----------------------|------|------------------------|
|                                   | EC <sub>50</sub> (nM) | Fold  | EC <sub>50</sub> (nM) | fold | EC <sub>50</sub> (nM) | fold | EC <sub>50</sub> (nM) | fold |                        |
| S1PR1                             | siponimod             |       | ozanimod              |      | SEW2871               |      | cenerimod             |      |                        |
| WT                                | 3.58±0.85             | 1.0   | 6.18±2.48             | 1.0  | 0.62±0.32             | 1.0  | 4.95±1.73             | 1.0  | 100                    |
| Y29A                              | 82.54±20.52           | 23.1  | 20.43±5.78            | 3.3  | 15.04±10.31           | 24.2 | -                     | -    | 94.68±18.9             |
| K34A                              | ND                    | ND    | 1.02±0.40             | 0.2  | 4.45±3.14             | 7.2  | -                     | -    | 93.39±17.5             |
| N101 <sup>2.60</sup> A            | 4.61±1.70             | 1.28  | 5.34±2.84             | 0.8  | 6.17±3.94             | 9.9  | 411.4±162.0           | 83.1 | 123±21.4               |
| R120 <sup>3.28</sup> A            | 680±482               | 189.9 | 7.77±2.83             | 1.2  | 14.78±7.73            | 23.8 | -                     | -    | 85.60±17.5             |
| E121 <sup>3.29</sup> A            | 10.9±3.88             | 3.0   | 28.34±12.69           | 4.6  | 86.66±5.36            | 139  | 8.18±2.74             | 1.6  | 107.7±18.9             |
| F210 <sup>5.47</sup> A            | 10.44±5.53            | 1.9   | 8.3±2.88              | 1.3  | -                     | -    | 13.74±2.78            | 2.7  | 89.94±21.4             |
| F273 <sup>6.52</sup> A            | 10.7±6.37             | 2.9   | 9.16±5.11             | 1.5  | -                     | -    | 18.59±8.31            | 3.7  | 71.6±27.6              |
| C206 <sup>5.43</sup> A            | 24.58±14.44           | 6.8   | 28.7±11.5             | 4.6  | -                     | -    | 17.98±8.36            | 3.6  | 72.76±17.5             |
| T207 <sup>5.44</sup> A            | 32.23±3.27            | 9.0   | 2.4±3.7               | 0.4  | -                     | -    | 203.6±150.2           | 41.1 | 119.6±17.5             |
| L128 <sup>3.36</sup> A            | 17.69±4.92            | 4.9   | -                     | -    | -                     | -    | -                     | -    | 139.8±18.9             |
| W269 <sup>6.48</sup> F            | 24.46±11.4            | 6.8   | -                     | -    | -                     | -    | -                     | -    | 82.68±17.5             |
| W269 <sup>6.48</sup> A            | ND                    | ND    | -                     | -    | -                     | -    | -                     | -    | 76.26±21.4             |
| K250 <sup>6.29</sup> A            | ND                    | ND    | -                     | -    | -                     | -    | -                     | -    | 101.7±18.9             |
| R78 <sup>2.37</sup> A             | 23.64±10.44           | 6.6   | -                     | -    | -                     | -    | -                     | -    | 83.46±17.5             |
| R142 <sup>3.50</sup> A            | ND                    | ND    | -                     | -    | -                     | -    | -                     | -    | 88.46±18.9             |
| R238 <sup>ICL3</sup> A            | 19.21±1.78            | 5.3   | -                     | -    | -                     | -    | -                     | -    | 132.9±17.5             |
| ICL3 <sup>R238A/K239A/K243A</sup> | 25.5±1.71             | 7.1   | -                     | -    | -                     | -    | -                     | -    | 126.3±18.7             |
| L151 <sup>ICL2</sup> A            | 2.22±0.59             | 0.6   | -                     | -    | -                     | -    | -                     | -    | 77.63±17.5             |
| L151 <sup>ICL2</sup> F            | 3.87±1.39             | 1.1   | -                     | -    | -                     | -    | -                     | -    | 69.84±16.8             |
| L151 <sup>ICL2</sup> P            | 3.05±1.45             | 0.8   | -                     | -    | -                     | -    | -                     | -    | 103.5±18.4             |
| M149 <sup>ICL2</sup> A            | ND                    | ND    | -                     | -    | -                     | -    | -                     | -    | 76.85±17.5             |
| N30D                              | 4.44±3.05             | 1.2   | -                     | -    | -                     | -    | -                     | -    | 113.4±18.9             |
| N30Q                              | 6.64±2.28             | 1.8   | -                     | -    | -                     | -    | -                     | -    | 85.02±17.5             |
| N30A                              | 19.6±1.30             | 5.5   | -                     | -    | -                     | -    | -                     | -    | 70.56±18.9             |
| R292 <sup>7.34</sup> Q            | 3.24±0.70             | 0.9   | -                     | -    | 5.4±3.56              | 8.7  | -                     | -    | 86.9±18.9              |
| R292 <sup>7.34</sup> A            | 5.77±4.35             | 1.6   | -                     | -    | 14.6±5.52             | 23.5 | -                     | -    | 64.1±17.5              |
| S1PR1-N-T<br>4L-DC338             | 3.69±0.95             | 1.0   | -                     | -    | -                     | -    | -                     | -    | 135±16.5               |

ND means not detected. “-” means no measurement.
