# Supplementary material
Source: PubMed Central journal article supplement (PMC8648956)
Supplement: 41422_2021_566_MOESM11_ESM.pdf [file 41422_2021_566_MOESM11_ESM.pdf]

Supplementary information Table S3. Summary of cAMP inhibition assay of S1PR5.

| Receptor               | cAMP inhibition assay |      |                       |      | Expression level (%WT) |
|------------------------|-----------------------|------|-----------------------|------|------------------------|
|                        | EC <sub>50</sub> (nM) | Fold | EC <sub>50</sub> (nM) | fold |                        |
| S1PR5                  | siponimod             |      | SEW2871               |      |                        |
| WT                     | 4.18±0.24             | 1.0  | 120.4±89.3            | 1.0  | 100                    |
| R139 <sup>3.56</sup> A | ND                    | ND   | -                     | -    | 62.64±15.9             |
| R245 <sup>6.29</sup> A | ND                    | ND   | -                     | -    | 65.89±14.1             |
| R133 <sup>3.50</sup> A | ND                    | ND   | -                     | -    | 74.55±15.5             |
| R140 <sup>1CL2</sup> A | ND                    | ND   | -                     | -    | 88.11±11.8             |
| P142 <sup>1CL2</sup> L | 3.02±1.80             | 0.72 | -                     | -    | 81.72±16.2             |
| N20D                   | ND                    | ND   | -                     | -    | 74.43±18.5             |
| N20A                   | ND                    | ND   | -                     | -    | 56.75±13.3             |
| N20Q                   | ND                    | ND   | -                     | -    | 49.66±10.3             |
| Q287 <sup>7.37</sup> R | 17.9±11.3             | 4.3  | 42.86±22.02           | 0.35 | 77.54±12.5             |
| S1PR5-DC345            | 5.21±1.96             | 1.2  | -                     | -    | 135.9±16.7             |

ND means not detected. “-” means no measurement.
